# Supplementary material for: Insights into POT1 structural dynamics revealed by cryo-EM
Source: PubMed Central journal article supplement (PMC8853558; doi:10.1371/journal.pone.0264073), 2022-02-17

**A** [...]GGG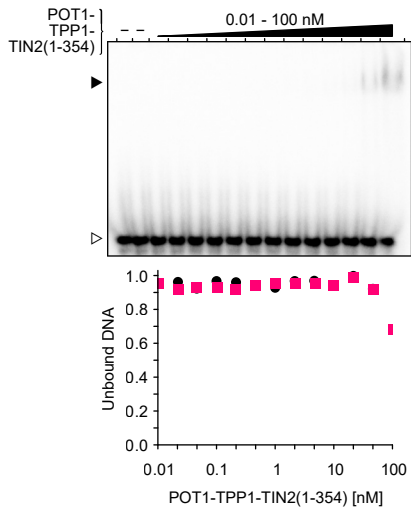**B** [...]GGGTTAGGG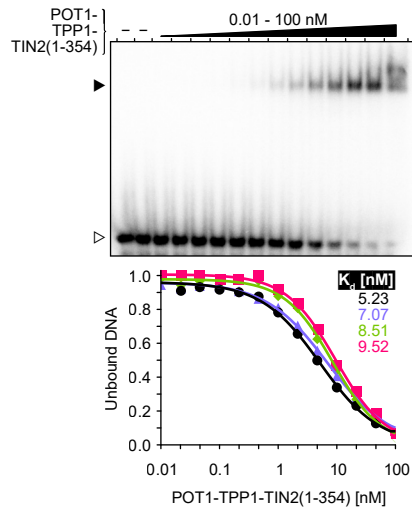**C** [...]GGGTTAGGGT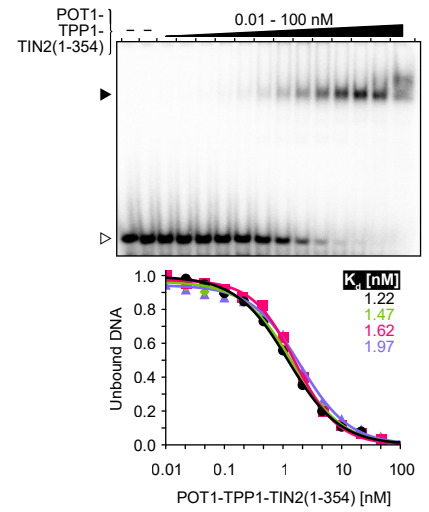**D** [...]GGGTTAGGGTT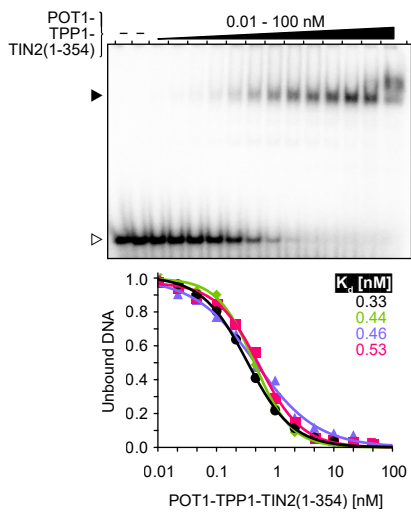**E** [...]GGGTTAGGGTTA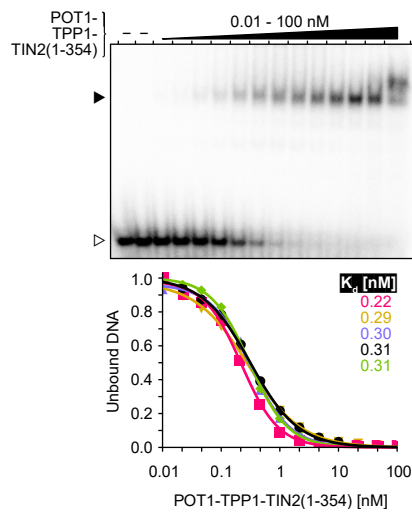**F** [...]GGGTTAGGGTTAG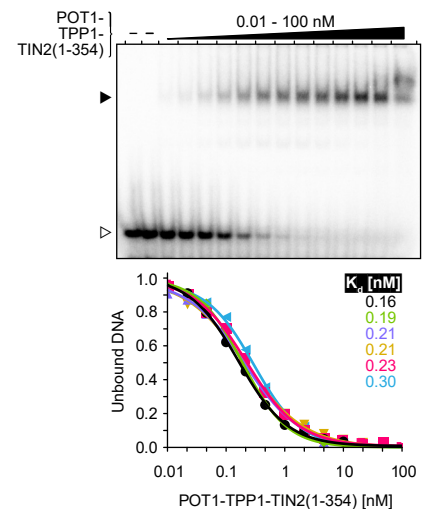**G** [...]GGGTTAGGGTTAGG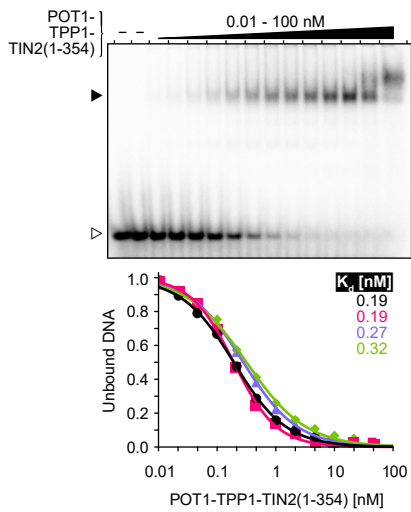**H** [...]GGGTTAGGGTTAGGG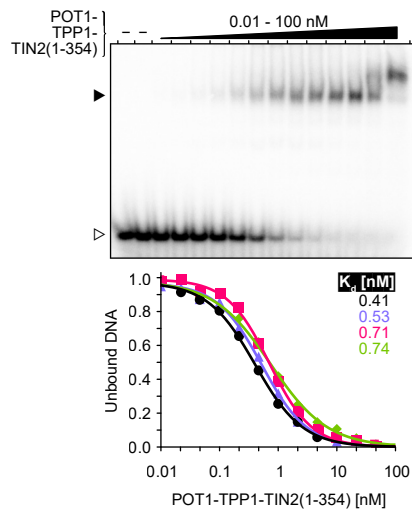

**I** [...]GGGTTAGGG<sup>▲▲▲▲▲</sup>TTAG

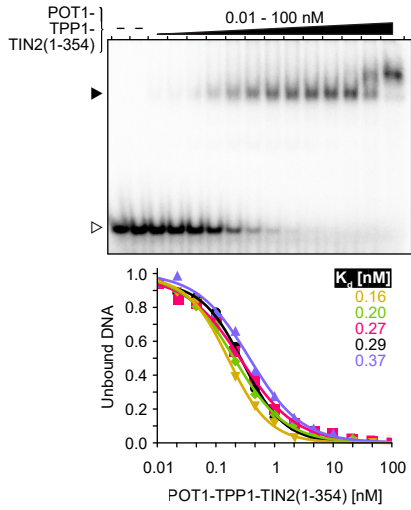

**J** [...]GGGTTAGGG<sup>~▲~▲~▲</sup>TTAG

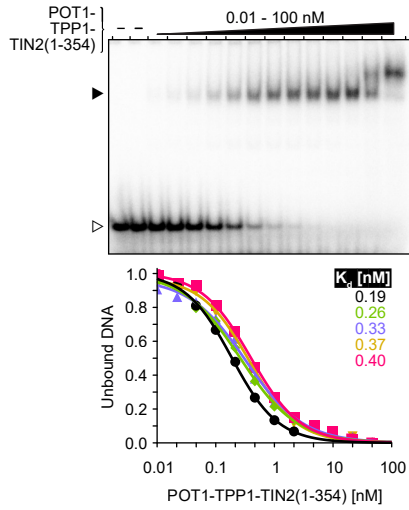

**K** [...]GGGTTAGGGCCTCTTTTAG

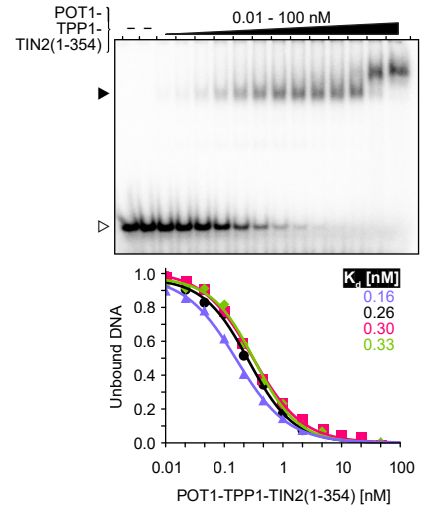

**L** [...]GGGTTAGGG<sup>▲▲▲▲▲</sup>TTAGGG

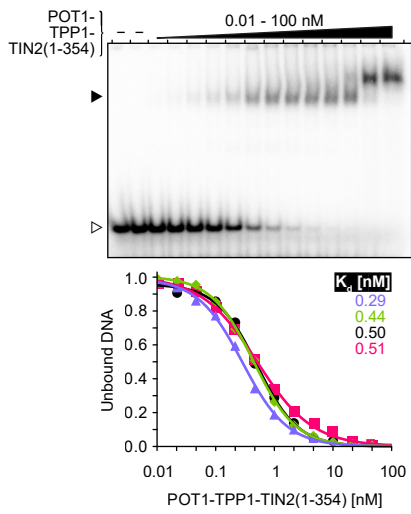

**M** [...]GGGTTAGGGCCTCTTTAGGG

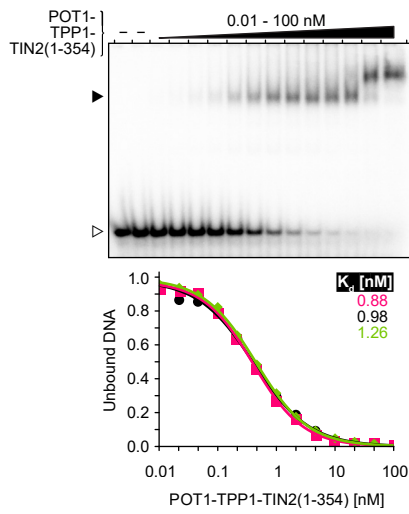

**N** [...]GGGTTAGGG<sup>▲▲▲▲▲</sup>

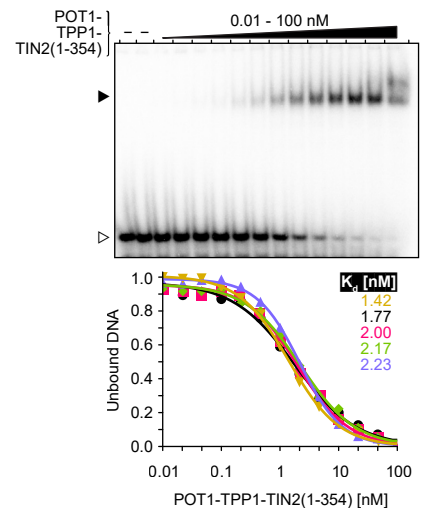

**O** [...]GGGTTAGGGCCTCTT

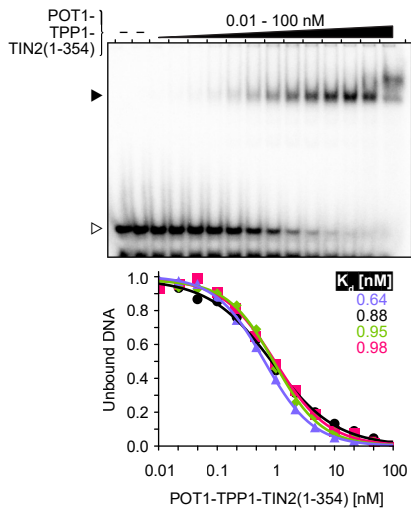

**P** [...]GGG<sup>▲▲▲▲▲</sup>TTAG

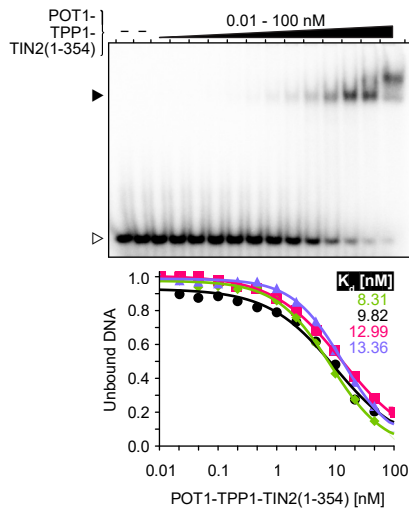

**Q** [...]GGGCCTCTTTTAG

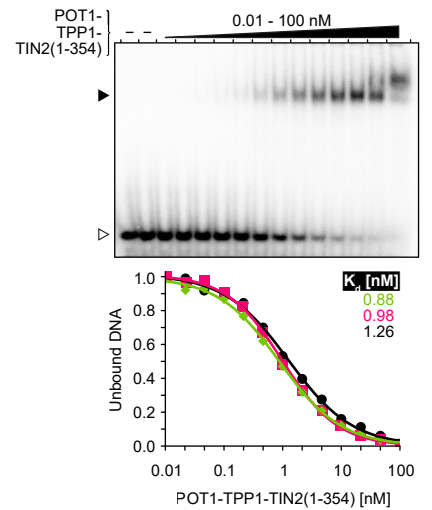

Supplement: pone.0264073.s006.pdf [file pone.0264073.s006.pdf]
