# Supplementary material for: Insights into POT1 structural dynamics revealed by cryo-EM
Source: PubMed Central journal article supplement (PMC8853558; doi:10.1371/journal.pone.0264073), 2022-02-17
Supplement: pone.0264073.s001.pdf [file pone.0264073.s001.pdf]

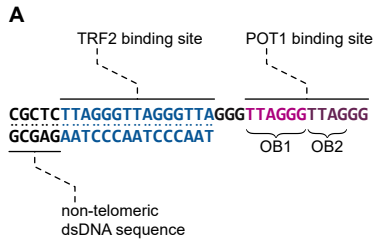

**B**

| Name     | Sequence (5' → 3')                       | Application          | Used in (Fig.) |
|----------|------------------------------------------|----------------------|----------------|
| sstel064 | GGTTAGGGTTAG                             | SEC                  | S3             |
| telo666  | CGCTCTTAGGGTTAGGGTTAGGGTTAGcGTTAGGG      | Telomerase assay     | S2C            |
| telo00   | CGCTCTTAGGGTTAGGGTTAGGG                  | EMSA                 | S6A            |
| telo60   | CGCTCTTAGGGTTAGGGTTAGGGTTAGGG            | EMSA                 | S6B            |
| telo61   | CGCTCTTAGGGTTAGGGTTAGGGTTAGGGT           | EMSA                 | S6C            |
| telo62   | CGCTCTTAGGGTTAGGGTTAGGGTTAGGGTT          | EMSA                 | S6D            |
| telo63   | CGCTCTTAGGGTTAGGGTTAGGGTTAGGGTTA         | EMSA                 | S6E            |
| telo64   | CGCTCTTAGGGTTAGGGTTAGGGTTAGGGTTAGG       | EMSA, WEMSA          | S6F, S7A       |
| telo65   | CGCTCTTAGGGTTAGGGTTAGGGTTAGGGTTAGG       | EMSA                 | S6G            |
| telo66   | CGCTCTTAGGGTTAGGGTTAGGGTTAGGGTTAGGG      | EMSA                 | S6H            |
| telo6^4  | CGCTCTTAGGGTTAGGGTTAGGGTTAGGG^4TTAG      | EMSA                 | S6I            |
| telo6~4  | CGCTCTTAGGGTTAGGGTTAGGGTTAGGG~4TTAG      | EMSA                 | S6J            |
| telo6#4  | CGCTCTTAGGGTTAGGGTTAGGGTTAGGGCCTCTTTAG   | EMSA                 | S6K            |
| telo6^6  | CGCTCTTAGGGTTAGGGTTAGGGTTAGGG^6TTAGGG    | EMSA                 | S6L            |
| telo6#6  | CGCTCTTAGGGTTAGGGTTAGGGTTAGGGCCTCTTTAGGG | EMSA                 | S6M            |
| telo6^   | CGCTCTTAGGGTTAGGGTTAGGGTTAGGG^TTAGGG     | EMSA                 | S6N            |
| telo6#   | CGCTCTTAGGGTTAGGGTTAGGGTTAGGGCCTCTT      | EMSA                 | S6O            |
| telo^4   | CGCTCTTAGGGTTAGGGTTAGGG^4TTAG            | EMSA                 | S6P            |
| telo#4   | CGCTCTTAGGGTTAGGGTTAGGGCCTCTTTAG         | EMSA                 | S6Q            |
| ctelo    | TAACCCCTAACCTAAGAGCG                     | Complementary strand | S2C, S6, S7    |
| rand     | TGCTCTGACACGAAATCTGCT                    | Random carrier ssDNA | S6, S7         |
