# Supplementary material for: Insights into POT1 structural dynamics revealed by cryo-EM
Source: PubMed Central journal article supplement (PMC8853558; doi:10.1371/journal.pone.0264073), 2022-02-17

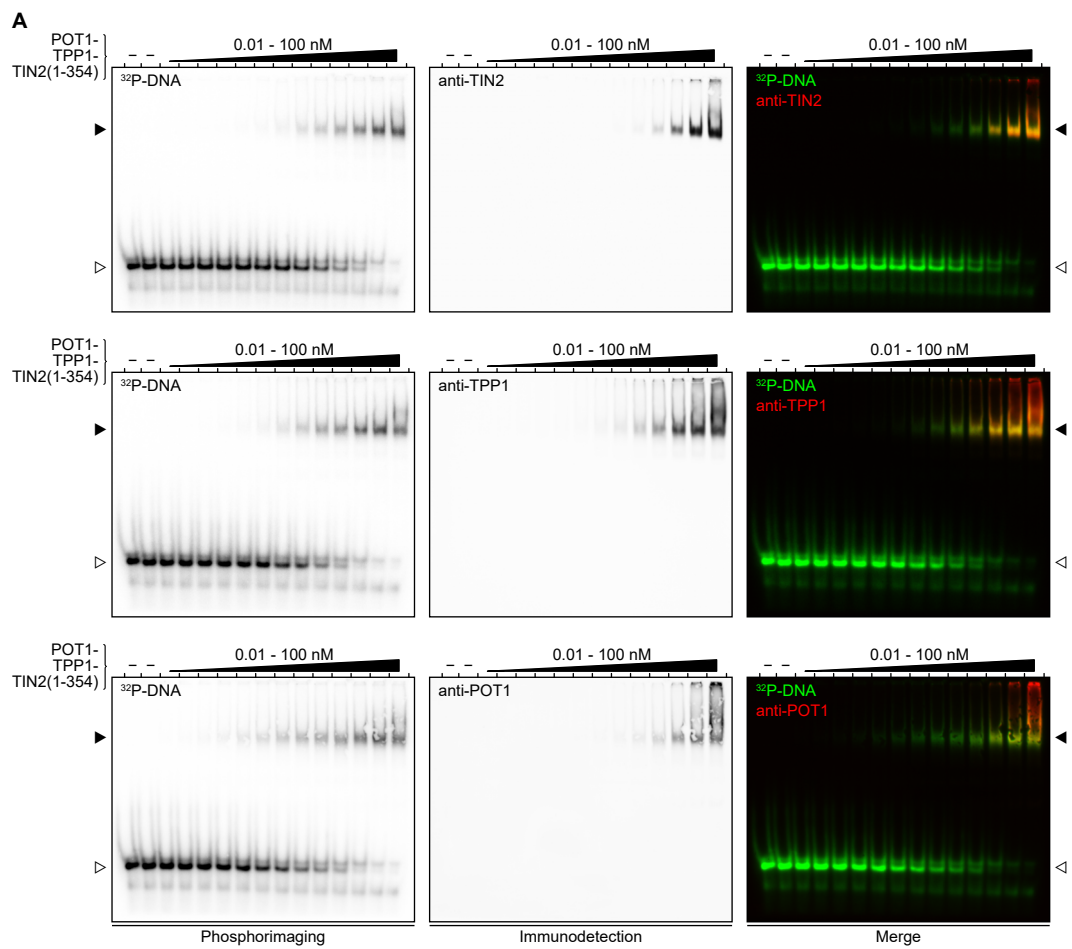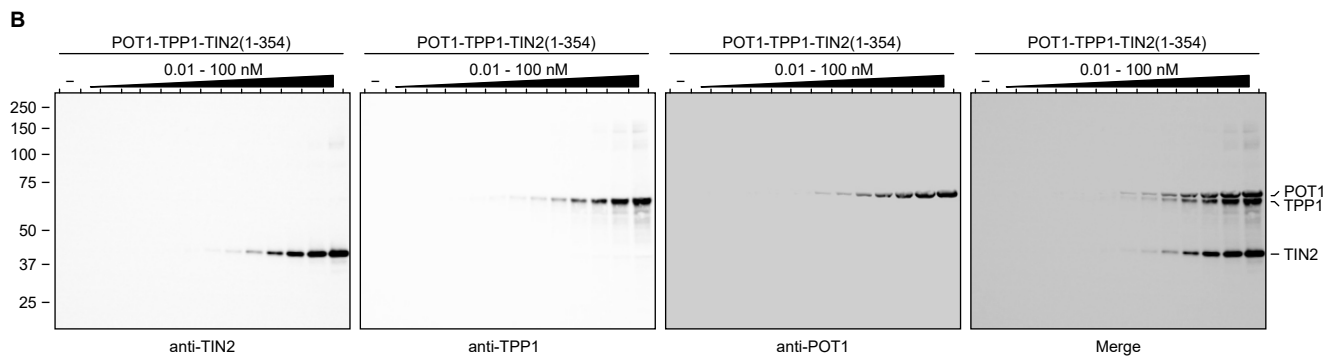

Supplement: pone.0264073.s007.pdf [file pone.0264073.s007.pdf]
